# Supplementary material
Source: publisher figshare collection journal article supplement (https://acs.figshare.com/ndownloader/files/22720295)
Supplement: Supplementary file 1 [file 22720295]

Archive with 3 entries (3 files):
- info.xml
- cn0c00096_high_quality.mp4
- cn0c00096.pdf
