# Supplementary material
Source: publisher figshare collection journal article supplement (https://acs.figshare.com/ndownloader/files/22720295)
Supplement: Supplementary file 1 [file 22720295 › info.xml]

<presentation>
	<article>
		<title>Physiological and pathological roles of Cdk5: potential directions for therapeutic targeting in neurodegenerative disease</title>
		<doi>10.1021/acschemneuro.0c00096</doi>
		<copyright>American Chemical Society</copyright>
		<narrator>Venkata Yenugonda, Ariana Waters</narrator>
		<contact>Venkata Yenugonda</contact>
		<contact-email>vmy@jwci.org</contact-email>
		<author-list>
			<author>Venkata Mahidhar Yenugonda</author>
		</author-list>
	</article>
	<slides height-width-ratio=".75">
		<slide audio-time="28">
			<subtitle/>
		</slide>
		<slide audio-time="69">
			<subtitle/>
		</slide>
		<slide audio-time="75">
			<subtitle/>
		</slide>
		<slide audio-time="83">
			<subtitle/>
		</slide>
		<slide audio-time="72">
			<subtitle/>
		</slide>
		<slide audio-time="77">
			<subtitle/>
		</slide>
		<slide audio-time="85">
			<subtitle/>
		</slide>
		<slide audio-time="49">
			<subtitle/>
		</slide>
	</slides>
	<audio duration="538"/>
</presentation>
